1 **Prevalence and predictors of HIV testing among young men in**  
2 **Papua New Guinea: a cross-sectional analysis of a nationally**  
3 **representative sample**

4  
5 McKenzie Maviso<sup>1\*</sup>

6  
7 <sup>1</sup> Division of Public Health, School of Medicine and Health Sciences, University of Papua New  
8 Guinea, Port Moresby, Papua New Guinea

9  
10 \*Corresponding author

11 Email: [mckenzie.maviso@upng.ac.pg](mailto:mckenzie.maviso@upng.ac.pg)

12

13

14

15

16

17

18

19

20

21

22

23

24

25 **Prevalence and predictors of HIV testing among young men in**  
26 **Papua New Guinea: a cross-sectional study of a nationally**  
27 **representative sample**

28

29 **Abstract**

30 **Background**

31 HIV testing is an important component of HIV prevention and serves as a gateway to other HIV-related  
32 services. However, the uptake remains suboptimal among young people, particularly in highly  
33 prevalent settings such as Papua New Guinea (PNG). This study used nationally representative data to  
34 assess the prevalence and determine predictors of HIV testing uptake among young men aged 15–24  
35 years in PNG.

36 **Methods**

37 The 2016–2018 PNG Demographic and Health Survey (PNGDHS) data was used. A total of 1,275  
38 young men aged 15–24 years were included in the final analysis. Descriptive, bivariate, and  
39 multivariable logistic regression analyses were performed to determine independent predictors of HIV  
40 testing. Adjusted odds ratios (AORs) with 95% confidence intervals (CIs) were reported. All analyses  
41 were adjusted using survey weights to account for unequal sampling probabilities.

42 **Results**

43 The overall prevalence of HIV testing among young men was 17.2% (95% CI: 15–19). Of those who  
44 were tested for HIV, most lived in rural areas (73%), about one-third had a sexual debut at age <15  
45 years (32.9%), and 33.9% inconsistently used condoms during sex. In multivariable analysis, men aged  
46 20–24 years (AOR 1.18, 95% CI: 1.00–2.31), who own mobile phones (AOR 1.43, 95% CI: 1.00–  
47 2.55), who were aware that consistent condom use during sex can reduce HIV risk (AOR 2.18, 95% CI:

48 1.18–4.04), who had paid for sex (AOR 1.75, 95% CI: 1.01–5.83), and who had two or more sexual  
49 partners (AOR 1.37, 95% CI: 1.01–3.14) had increased odds of HIV testing. However, decreased odds  
50 of HIV testing were found among men who were never married (AOR 0.51, 95% CI: 0.29–0.88), lived  
51 in rural areas (AOR 0.54, 95% CI: 0.32–0.92), and consistently used condoms during sex (AOR 0.59,  
52 95% CI: 0.34–1.01).

## 53 **Conclusion**

54 The findings show that HIV testing is low among young men in PNG. To increase HIV testing uptake  
55 among young men, it is crucial to implement comprehensive youth-friendly HIV/STI education and  
56 tailored sensitization programs and enable more accessible and affordable HIV testing services. Also,  
57 outreach and community-based testing programs for young men in prioritized areas requiring urgent  
58 prevention intervention are feasible options in PNG.

## 60 **Introduction**

61 Considerable progress has been made in responding to HIV/AIDS under the Sustainable Development  
62 Goals framework to end the epidemic by 2030 [1]. Since 2010, new HIV infection rates have decreased  
63 by 14%, and 78% of people living with HIV know their status [2]. However, in the Asia and Pacific  
64 region, the HIV response is impacted by marked disparities and varied epidemic trends, notably  
65 affecting young people aged 15–24 years, who represent a growing proportion of people who  
66 disproportionately endure the burden of HIV. In 2022, an estimated 440,000 young people were living  
67 with HIV, accounting for about 25% of new HIV infections in the region [2].

68 The United Nations' 95-95-95 targets to end the HIV epidemic by 2030 called for 95% of  
69 people living with HIV to know about their serostatus [3,4]. HIV testing is a key strategic entry point to  
70 prevention, treatment, care, and support services. It confers multiple benefits for individuals who test

71 positive and those who test negative and encourages preventive behaviors [5,6]. Despite the significant  
72 benefits, young people remain the least likely to get an HIV test and know their HIV status [15,27].  
73 Studies have shown that not all, particularly men willingly seek HIV testing services as a way to  
74 prevent HIV transmission and/or acquisition due to various barriers, such as individual (poor  
75 HIV/AIDS knowledge, testing availability, and unwillingness to test), social (stigma, discrimination,  
76 and lack of social support), and health service utilization (loss of trust or confidence in health workers  
77 and lack of medication, including ART) [7–9]. These barriers undermine efforts to increase HIV testing  
78 and highlight the critical need to develop appropriate HIV prevention strategies.

79         Among young people, their sexual behaviors and susceptibility to HIV infection differ widely  
80 by social context, as well as increased individual autonomy and a lack of social control [10,11]. For  
81 example, high-risk behaviors such as early sexual debut, substance use (alcohol consumption and drug  
82 use), inconsistent condom use, and multiple and concurrent sexual relationships, as well as poor HIV  
83 knowledge, low-risk perception, and sensation-seeking behaviors, increase HIV risks and transmissions  
84 among young people [12–15]. In addition, biological factors such as low rates of male circumcision  
85 [16,17] and manifestations of other sexually transmitted infections (STIs) (chlamydia, gonorrhea,  
86 syphilis, and trichomoniasis) [18,19] contribute to some of the increased HIV risk and burden among  
87 this population. Despite young people’s vulnerability to HIV infection, they are frequently overlooked  
88 in the design and implementation of national AIDS strategies [20,21]. They remain an important target  
89 group for HIV prevention and STI surveillance due to their unique behavioral and social-related  
90 vulnerability.

91         PNG is one of the culturally diverse countries in the Western Pacific region and is grappling  
92 with a concentrated-generalized HIV epidemic, indicating significant disparities in HIV prevalence  
93 between key populations (e.g., sex workers and men who have sex with men) and the general  
94 population [22,23]. HIV prevalence is 1% in the general adult population [24]. Among young people,

95 the prevalence of HIV is estimated at 0.2% for males and 0.5% for females [24], demonstrating the  
96 high vulnerability of this priority group in the country. Although HIV testing services are widely  
97 available throughout PNG [25], the current testing rate among young people is suboptimal, especially  
98 among those most at risk of HIV [26,27]. Furthermore, a major obstacle in the country continues to be  
99 young men's participation in HIV programs and their access to sexual and reproductive health care  
100 [28,29]. Evidence concerning HIV knowledge and risk reduction behaviors (e.g., consistent use of  
101 condoms and having only one faithful sexual partner) among young men is scarce; although a recent  
102 study among young women in PNG found that early sexual debut, having one sexual partner and not  
103 having an STI were associated with not testing for HIV [26]. However, young men's knowledge of  
104 HIV and sexual relationships is established through a complex interplay of sociocultural norms,  
105 expectations, attitudes, and information gleaned from various sources [30].

106 Despite the established profile of risky sexual behaviors among young people [26,31,32], little  
107 is known about the prevalence and correlates of HIV testing uptake in young men in PNG. Moreover,  
108 evidence concerning predictors influencing the uptake of HIV testing among young men is scarce. This  
109 creates a critical knowledge gap that must be filled to inform national-level policy development and  
110 targeted interventions. In this study, data from a nationally representative survey was used to determine  
111 the prevalence and predictors of HIV testing uptake among young men aged 15–24 years in PNG.

## 112 **Methods and materials**

### 113 **Data sources**

114 Data for the current study were derived from the 2016–2018 PNG Demographic and Health Survey  
115 (PNGDHS), which used a stratified, multistage cluster sampling method to ensure a sample  
116 representative of the population. The survey was conducted between October 2016 and December 2018  
117 and collected data on the country's important demographic, socioeconomic, and health indicators. The

118 survey used the list of census units (CUs) from the 2011 PNG National Population and Housing Census  
119 [33] as the sampling frame, which contains information on CU location, type of residence (urban or  
120 rural), estimated number of residential households, and population by sex. Administratively, the  
121 country is divided into four (4) main regions (Southern, Highlands, Momase, and Islands) comprising  
122 22 provinces, and each province is subdivided into urban and rural areas. The PNG National Statistical  
123 Office (NSO) with technical support and assistance from the Inner City Fund (ICF) through the DHS  
124 Program conducted the study. The governments of PNG and Australia, the United Nations Population  
125 Fund (UNFPA), and the Children’s Fund of the United Nations (UNICEF) funded the survey [34].

## 126 **Sampling procedures**

127         The 2016–2018 PNGDHS sample stratification and selection were achieved in two strata: urban  
128 and rural areas, except for the National Capital District, which has no rural areas. In each stratum,  
129 samples of households were selected in two stages, with CU constituting the primary sampling unit and  
130 households as the secondary sampling unit. The first stage involved selecting 800 CUs using a  
131 probability proportional to the CU size. In the second stage, 24 households were selected from each  
132 cluster using probability sampling, yielding a total sample size of approximately 19,200 households. A  
133 total of 7,333 men aged 15–49 years participated in the survey. Young men who never had sex and  
134 aged 25 or more were excluded from this study. A total weighted sample of 1,275 young men aged 15–  
135 24 years who ever had sex with variables of interest were included in this study. Details about the  
136 sampling technique, survey team training, household selection, survey questionnaires, and validation  
137 procedures are available in the final report [34].

138

139

140

## 141 **Variables and measurements**

142 The primary outcome variable of this study was “ever tested for HIV?” and was dichotomized as “0”  
143 for “no” or “1” for “yes.” The explanatory variables were selected based on the literature and their  
144 relevance [18–20] and were divided into three categories: (1) Sociodemographic factors include age,  
145 marital status, educational level, employment status, wealth index, region, and place of residence. Also,  
146 household factors measured included exposure to mass media (listening to the radio and watching  
147 television), access to the internet, and mobile phone ownership. (2) HIV-related knowledge includes  
148 ever heard of AIDS or STIs, can a healthy person have HIV? Can a person get HIV by sharing food  
149 with an infected person? Can a person get HIV through witchcraft? Consistent condom use can reduce  
150 HIV risk and knowing an HIV testing facility. (3) Sexual risk behaviors include age of sexual debut,  
151 number of sexual partners (including spouse), having ever paid for sex, and consistent condom use  
152 during sex, and having had an STI (unspecific) in the last 12 months.

## 153 **Statistical analysis**

154 Data extraction, recoding, and analysis were performed using IBM Statistical Package for the Social  
155 Sciences (SPSS), Version 26.0 (Armonk, NY: IBM Corp.). The sample was weighted using the  
156 primary sampling unit variable, stratification variable, and weight variable to restore its  
157 representativeness and obtain a better estimate throughout the analysis. Descriptive statistics were used  
158 to explore the characteristics of the sample and were presented as weighted frequencies ( $n$ ) and  
159 percentages (%). A chi-square test for independence was performed to assess the strength of the  
160 association between the dependent variable and each independent variable. Variables that were  
161 significant and those with  $p \leq 0.25$  in the bivariate analysis were included in a multivariable analysis to  
162 determine their collective associations with HIV testing [38]. Since the PNGDHS used a two-stage  
163 stratified sampling technique, a complex samples analysis technique was employed to determine

164 independent predictors of HIV testing. Adjusted odds ratios (AORs) with 95% confidence intervals  
165 (CIs) were reported. A  $p \leq 0.05$  was used to assess statistical significance.

## 166 **Ethical Considerations**

167 Permission to use data was obtained from the DHS program (<https://dhsprogram.com>) and was only  
168 used for this study. The Institutional Review Board (IRB) of Inner City Fund (ICF) International and  
169 the IRB committee of PNG examined and approved the 2016–2018 PNGDHS protocols. All the  
170 respondents had provided verbal informed consent before each interview. There were no ethical  
171 considerations on the researcher's part as the data were anonymized entirely, with no identifiable  
172 information on the survey participants when analyzed.

## 173 **Results**

### 174 **Sociodemographic characteristics of young men**

175 Table 1 presents the participants' characteristics. Overall, 1,275 sexually active young men aged 15–24  
176 years enrolled in the study. The mean age was 20.84 ( $\pm$  2.31) years, while the majority (70.2%) were  
177 aged 20–24 years and lived in rural areas (82%). Nearly half had attained primary (44.3%) and  
178 secondary (45.5%) education, and about two-thirds (62%) were unemployed. Regarding mass media  
179 exposure, more than two-thirds of young men listened to the radio (71.7%), while less than half  
180 watched television (47.1%) and had internet access (33.6%). More than half (57.8%) of young men  
181 owned mobile phones.

182

183

184

185



**Table 1. Sociodemographic characteristics of participants (N = 1,275)**

| Characteristics                         | Frequency |      |
|-----------------------------------------|-----------|------|
|                                         | <i>n</i>  | %    |
| <i>Sociodemographic</i>                 |           |      |
| Age (years)                             |           |      |
| 15–19                                   | 380       | 29.8 |
| 20–24                                   | 895       | 70.2 |
| Marital status (missing, <i>n</i> = 26) |           |      |
| Never married                           | 940       | 75.2 |
| Married                                 | 310       | 24.8 |
| Educational level                       |           |      |
| No formal education                     | 73        | 5.7  |
| Primary                                 | 565       | 44.3 |
| Secondary                               | 580       | 45.5 |
| Tertiary                                | 58        | 4.5  |
| Employment status                       |           |      |
| Not employed                            | 791       | 62.0 |
| Employed                                | 485       | 38.0 |
| Wealth Index                            |           |      |
| Poorest                                 | 120       | 9.4  |
| Poorer                                  | 119       | 9.3  |
| Middle                                  | 189       | 14.8 |
| Richer                                  | 294       | 23.0 |
| Richest                                 | 553       | 43.4 |
| Place of residence                      |           |      |
| Urban                                   | 229       | 18.0 |
| Rural                                   | 1,046     | 82.0 |
| Region                                  |           |      |
| Southern                                | 300       | 23.6 |
| Highlands                               | 455       | 35.7 |
| Momase                                  | 373       | 29.2 |
| Islands                                 | 147       | 11.5 |
| Read newspaper/magazine                 |           |      |
| No                                      | 369       | 28.9 |
| Yes                                     | 907       | 71.1 |
| Listen to the radio                     |           |      |

|                    |     |      |
|--------------------|-----|------|
| No                 | 361 | 28.3 |
| Yes                | 914 | 71.7 |
| Watch television   |     |      |
| No                 | 674 | 52.9 |
| Yes                | 601 | 47.1 |
| Internet access    |     |      |
| No                 | 847 | 66.4 |
| Yes                | 428 | 33.6 |
| Own a mobile phone |     |      |
| No                 | 537 | 42.2 |
| Yes                | 738 | 57.8 |

**Note:** Weighted frequencies (*n*) and percentages (%)

186

## 187 **The prevalence of having ever been tested for HIV**

188 Overall, 17.1% (95% CI: 0.15, 0.19) of the young men had ever been tested for HIV (Fig 1).

189

190 **Fig 1.** The rates of HIV testing among young men in PNG.

191

## 192 **HIV knowledge and sexual risk behaviors**

193 Table 2 shows the HIV-related knowledge and sexual risk behaviors of young men. The vast majority  
 194 of young men had adequate knowledge that a healthy person can have HIV (90.8%) and that using  
 195 consistent condom use during sex can reduce the risk of HIV transmission (80.2%). Most knew of an  
 196 HIV testing facility (70.8%). Regarding young men's sexual risk behaviors, over a quarter were  
 197 reported to have initiated sex at an early age (<15 years) (28.2%) and inconsistently used condoms  
 198 during sex (27.7%). The majority of young men had a single sexual partner in the last 12 months  
 199 (88.7%).

200

**Table 2. HIV knowledge and sexual risk behaviors of young men (N = 1,275)**

| Characteristics                                                                        | Frequency |      |
|----------------------------------------------------------------------------------------|-----------|------|
|                                                                                        | <i>n</i>  | %    |
| <b><i>HIV Knowledge</i></b>                                                            |           |      |
| Ever heard of AIDS                                                                     |           |      |
| No                                                                                     | 92        | 7.2  |
| Yes                                                                                    | 1,183     | 92.8 |
| Ever heard of STIs                                                                     |           |      |
| No                                                                                     | 74        | 5.8  |
| Yes                                                                                    | 1,201     | 94.2 |
| A healthy person can have HIV (missing, <i>n</i> = 326)                                |           |      |
| No                                                                                     | 88        | 9.2  |
| Yes                                                                                    | 861       | 90.8 |
| A person can get HIV by sharing food with an infected person (missing, <i>n</i> = 298) |           |      |
| No                                                                                     | 822       | 84.1 |
| Yes                                                                                    | 155       | 15.9 |
| A person can get HIV through witchcraft (missing, <i>n</i> = 297)                      |           |      |
| No                                                                                     | 908       | 92.8 |
| Yes                                                                                    | 70        | 7.2  |
| Consistent condom use during sex can reduce HIV risk (missing, <i>n</i> = 311)         |           |      |
| No                                                                                     | 191       | 19.8 |
| Yes                                                                                    | 773       | 80.2 |
| Know HIV testing facility (missing, <i>n</i> = 93)                                     |           |      |
| No                                                                                     | 346       | 29.2 |
| Yes                                                                                    | 836       | 70.8 |
| <b><i>Sexual Risk Behavior</i></b>                                                     |           |      |
| Age of sexual debut (years)                                                            |           |      |
| <15                                                                                    | 360       | 28.2 |
| >15                                                                                    | 916       | 71.8 |
| Number of sexual partners, including spouse (last 12 months)                           |           |      |
| 0–1                                                                                    | 1,130     | 88.7 |
| 2 or more                                                                              | 144       | 11.3 |
| Ever paid for sex (missing, <i>n</i> = 49)                                             |           |      |
| No                                                                                     | 1,164     | 94.9 |

|                                                       |       |      |
|-------------------------------------------------------|-------|------|
| Yes                                                   | 63    | 5.1  |
| Consistent condom use during sex (missing, $n = 95$ ) |       |      |
| No                                                    | 326   | 27.7 |
| Yes                                                   | 854   | 72.3 |
| Had any STIs (last 12 months) <sup>†</sup>            |       |      |
| No                                                    | 1,211 | 94.9 |
| Yes                                                   | 65    | 5.1  |

The type of STI was not specified in the dataset.

**Note:** Weighted frequencies ( $n$ ) and percentages (%)

201

## 202 **Bivariate analysis of predictors of HIV testing among young men**

203 Table 2 presents the relationship between sociodemographic characteristics, HIV knowledge, sexual  
204 risk behaviors, and HIV testing uptake among young men. Overall, only 17.1% ( $n = 222$ ) of young men  
205 have ever been tested for HIV across sociodemographic, HIV knowledge, and sexual risk behavior  
206 strata. Having ever been tested for HIV was high among men aged 20–24 years (78.8%), those who  
207 were married (66.5%), had attained secondary education (58.1%), were unemployed (53.6%), and lived  
208 in rural areas (73%). Similarly, HIV testing remained high among those who read a newspaper or  
209 magazine (81.5%), listened to the radio (79.2%), and watched television (53.2%). Regarding HIV  
210 knowledge, having ever heard of AIDS and STIs ( $p < 0.001$ ), being aware that consistent use of  
211 condoms can reduce HIV risk ( $p = 0.011$ ), and knowing an HIV testing facility ( $p < 0.001$ ) were  
212 significantly associated with HIV testing uptake. Furthermore, there was a statistically significant  
213 association between HIV testing and the following sexual risk behavior factors: age of sexual debut ( $p$   
214 = 0.049), ever paid for sex ( $p < 0.001$ ), consistent condom use ( $p = 0.02$ ), and having an STI in the past  
215 12 months ( $p < 0.001$ ).

216

217

218

**Table 3. Bivariate analysis of sociodemographic, HIV knowledge, behavior, and HIV testing (N = 1,275)**

| Characteristics                  | Ever been tested for HIV |      |                  |      | P-value |
|----------------------------------|--------------------------|------|------------------|------|---------|
|                                  | No<br>(n = 1,053)        | %    | Yes<br>(n = 222) | %    |         |
| <i>Sociodemographics</i>         |                          |      |                  |      |         |
| Age (years)                      |                          |      |                  |      | 0.002*  |
| 15–19                            | 333                      | 31.6 | 47               | 21.1 |         |
| 20–24                            | 720                      | 68.4 | 175              | 78.8 |         |
| Marital status (missing, n = 26) |                          |      |                  |      | 0.001** |
| Never married                    | 238                      | 23.0 | 72               | 33.5 |         |
| Married                          | 796                      | 77.0 | 143              | 66.5 |         |
| Educational level                |                          |      |                  |      | 0.000** |
| No formal education              | 68                       | 6.5  | 5                | 2.3  |         |
| Primary                          | 490                      | 46.5 | 75               | 33.8 |         |
| Secondary                        | 450                      | 42.7 | 129              | 58.1 |         |
| Tertiary                         | 45                       | 4.3  | 13               | 5.9  |         |
| Employment status                |                          |      |                  |      | 0.005*  |
| Not employed                     | 671                      | 63.7 | 119              | 53.6 |         |
| Employed                         | 382                      | 36.3 | 103              | 46.4 |         |
| Wealth Index                     |                          |      |                  |      | 0.271   |
| Poorest                          | 96                       | 9.1  | 24               | 10.9 |         |
| Poorer                           | 94                       | 8.9  | 25               | 11.3 |         |
| Middle                           | 162                      | 15.4 | 27               | 12.2 |         |
| Richer                           | 235                      | 22.3 | 58               | 26.2 |         |
| Richest                          | 466                      | 44.3 | 87               | 39.4 |         |
| Place of residence               |                          |      |                  |      | 0.000** |
| Urban                            | 169                      | 16.1 | 60               | 27.0 |         |
| Rural                            | 883                      | 83.9 | 162              | 73.0 |         |
| Region                           |                          |      |                  |      | 0.000** |
| Southern                         | 248                      | 23.6 | 53               | 23.8 |         |
| Highlands                        | 355                      | 33.7 | 100              | 44.8 |         |
| Momase                           | 332                      | 31.5 | 41               | 18.4 |         |
| Islands                          | 118                      | 11.2 | 29               | 13.0 |         |
| Read newspaper/magazine          |                          |      |                  |      | 0.000** |
| No                               | 328                      | 31.1 | 41               | 18.5 |         |
| Yes                              | 725                      | 68.9 | 181              | 81.5 |         |
| Listen to the radio              |                          |      |                  |      | 0.006*  |

|                                                                                    |     |      |     |      |         |
|------------------------------------------------------------------------------------|-----|------|-----|------|---------|
| No                                                                                 | 315 | 29.9 | 46  | 20.8 |         |
| Yes                                                                                | 738 | 70.1 | 175 | 79.2 |         |
| Watch television                                                                   |     |      |     |      | 0.048*  |
| No                                                                                 | 570 | 54.1 | 104 | 46.8 |         |
| Yes                                                                                | 483 | 45.9 | 118 | 53.2 |         |
| Internet access                                                                    |     |      |     |      | 0.000** |
| No                                                                                 | 730 | 69.3 | 117 | 52.7 |         |
| Yes                                                                                | 323 | 30.7 | 105 | 47.3 |         |
| Own a mobile phone                                                                 |     |      |     |      | 0.000** |
| No                                                                                 | 475 | 45.1 | 62  | 28.1 |         |
| Yes                                                                                | 578 | 54.9 | 159 | 71.9 |         |
| <b><i>HIV Knowledge</i></b>                                                        |     |      |     |      |         |
| Ever heard of AIDS                                                                 |     |      |     |      | 0.000** |
| No                                                                                 | 92  | 8.7  | 0   | 0    |         |
| Yes                                                                                | 961 | 91.3 | 222 | 100  |         |
| Ever heard of STIs                                                                 |     |      |     |      | 0.000** |
| No                                                                                 | 47  | 7.0  | 0   | 0    |         |
| Yes                                                                                | 979 | 93.0 | 222 | 100  |         |
| A healthy person can have HIV (missing, $n = 326$ )                                |     |      |     |      | 0.170   |
| No                                                                                 | 77  | 9.9  | 11  | 6.5  |         |
| Yes                                                                                | 702 | 90.1 | 158 | 93.5 |         |
| A person can get HIV by sharing food with an infected person (missing, $n = 298$ ) |     |      |     |      | 0.248   |
| No                                                                                 | 673 | 83.5 | 148 | 87.1 |         |
| Yes                                                                                | 133 | 16.5 | 22  | 12.9 |         |
| A person can get HIV through witchcraft (missing, $n = 297$ )                      |     |      |     |      | 0.376   |
| No                                                                                 | 739 | 92.5 | 168 | 94.4 |         |
| Yes                                                                                | 60  | 7.5  | 10  | 5.6  |         |
| Consistent condom use during sex can reduce HIV risk (missing, $n = 311$ )         |     |      |     |      | 0.011*  |
| No                                                                                 | 170 | 21.3 | 21  | 12.7 |         |
| Yes                                                                                | 627 | 78.7 | 145 | 87.3 |         |
| Know HIV testing facility (missing, $n = 93$ )                                     |     |      |     |      |         |
| No                                                                                 | 346 | 36.0 | 0   | 0    | 0.000** |
| Yes                                                                                | 614 | 64.0 | 222 | 100  |         |
| <b><i>Sexual Risk Behaviors</i></b>                                                |     |      |     |      |         |

|                                                                     |       |      |     |      |         |
|---------------------------------------------------------------------|-------|------|-----|------|---------|
| Age of sexual debut (years)                                         |       |      |     |      | 0.049*  |
| <15                                                                 | 287   | 27.3 | 73  | 32.9 |         |
| >15                                                                 | 766   | 72.7 | 149 | 67.1 |         |
| Number of sexual partners, including spouse (in the last 12 months) |       |      |     |      | 0.101   |
| 0–1                                                                 | 941   | 89.4 | 189 | 85.5 |         |
| 2 or more                                                           | 112   | 10.6 | 32  | 14.5 |         |
| Ever paid for sex (missing, <i>n</i> = 49)                          |       |      |     |      | 0.000** |
| No                                                                  | 971   | 96.7 | 192 | 88.1 |         |
| Yes                                                                 | 37    | 3.7  | 26  | 11.9 |         |
| Consistent condom use during sex (missing, <i>n</i> = 95)           |       |      |     |      | 0.020*  |
| No                                                                  | 251   | 26.2 | 75  | 33.9 |         |
| Yes                                                                 | 707   | 73.8 | 146 | 66.1 |         |
| Had any STIs (last 12 months) <sup>†</sup>                          |       |      |     |      | 0.000** |
| No                                                                  | 1,010 | 95.9 | 200 | 90.1 |         |
| Yes                                                                 | 43    | 4.1  | 22  | 9.9  |         |

\* $p \leq 0.05$

\*\* $p \leq 0.001$

<sup>†</sup>The type of STI was not specified in the dataset.

219

## 220 **Multivariable analysis of predictors of HIV testing among young men**

221 Table 3 shows the results of the multivariable analysis examining the association between HIV testing  
 222 uptake and sociodemographic, HIV-related knowledge, and sexual risk behavior variables. Age, marital  
 223 status, place of residence, being aware that consistent condom use during sex can reduce HIV risk, ever  
 224 paid for sex, number of sexual partners, and consistent condom use during sex were statistically  
 225 significant predictors of HIV testing uptake among young men. In the multivariable analysis, men aged  
 226 20–24 years (AOR 1.18, 95% CI: 1.00–2.31), who own mobile phones (AOR 1.43, 95% CI: 1.00–  
 227 2.55), who were aware that consistent condom use during sex can reduce HIV risk (AOR 2.18, 95% CI:  
 228 1.18–4.04), who had paid for sex (AOR 1.75, 95% CI: 1.01–5.83), and who had two or more sexual  
 229 partners (AOR 1.37, 95% CI: 1.01–3.14) had increased odds of HIV testing. However, decreased odds

230 of HIV testing uptake were found among men who were never married (AOR 0.51, 95% CI: 0.29–  
231 0.88), lived in rural areas (AOR 0.54, 95% CI: 0.32–0.92), and consistently used condoms during sex  
232 (AOR 0.59, 95% CI: 0.34–1.01).

## 233 **Discussion**

234 This study assessed the prevalence of HIV testing and determined important sociodemographic factors,  
235 HIV-related knowledge, and sexual risk behaviors associated with HIV testing uptake among young  
236 men aged 15–24 years using the PNGDHS data. Findings from this study revealed that only 17.1% of  
237 young men in this study had ever been tested for HIV, which is lower than that of research in other  
238 countries [37,39,40]. The differences could be attributed to differences in HIV knowledge and  
239 awareness and the availability and accessibility of HIV testing services in these countries. There is  
240 evidence that young men’s low uptake of HIV testing may be attributed to a lack of access to HIV  
241 testing services and a lack of trust in these services [35,41]. In addition, fear of stigmatization, fear of  
242 being diagnosed positive for HIV, the perceived risk of sexual exposure, poor attitudes by healthcare  
243 professionals, and the perceived psychological burden have been found to impede HIV testing uptake  
244 [35]. In PNG, HIV testing services have been more focused on the prevention of parent-to-child  
245 transmission [42–44] and key populations (e.g., sex workers) [45,46], while such progress is yet to be  
246 achieved with high-risk young populations. Given the importance of early HIV diagnosis and linking  
247 access to treatment and care, age-specific policy development is required to increase HIV testing  
248 uptake among this priority group.

249



**Table 3. Multivariable analysis of predictors of HIV testing among young men (N = 1,275)**

| Characteristics         | Ever been tested for HIV |           |      |           | p-value |
|-------------------------|--------------------------|-----------|------|-----------|---------|
|                         | COR                      | 95% CI    | AOR  | 95% CI    |         |
| Age (years)             |                          |           |      |           | 0.026*  |
| 15–19                   | Ref                      |           | Ref  |           |         |
| 20–24                   | 1.73                     | 1.09–2.76 | 1.18 | 1.00–2.31 |         |
| Marital status          |                          |           |      |           | 0.016*  |
| Never married           | 0.59                     | 0.39–0.89 | 0.51 | 0.29–0.88 |         |
| Married                 | Ref                      |           | Ref  |           |         |
| Educational level       |                          |           |      |           | 0.749   |
| No formal education     | 0.25                     | 0.05–1.09 | 0.83 | 0.13–5.33 |         |
| Primary                 | 0.53                     | 0.18–1.58 | 1.23 | 0.34–4.49 |         |
| Secondary               | 0.98                     | 0.31–3.09 | 1.55 | 0.42–5.69 |         |
| Tertiary                | Ref                      |           | Ref  |           |         |
| Employment status       |                          |           |      |           | 0.380   |
| Not employed            | 0.66                     | 0.45–0.97 | 0.78 | 0.45–1.36 |         |
| Employed                | Ref                      |           | Ref  |           |         |
| Place of residence      |                          |           |      |           | 0.023*  |
| Urban                   | Ref                      |           | Ref  |           |         |
| Rural                   | 0.52                     | 0.35–0.77 | 0.54 | 0.32–0.92 |         |
| Region                  |                          |           |      |           | 0.313   |
| Southern                | 0.87                     | 0.52–1.46 | 1.19 | 1.61–2.32 |         |
| Highlands               | 1.15                     | 0.71–1.86 | 1.15 | 0.60–2.18 |         |
| Momase                  | 0.49                     | 0.25–1.02 | 0.61 | 0.28–1.34 |         |
| Islands                 | Ref                      |           | Ref  |           |         |
| Read newspaper/magazine |                          |           |      |           | 0.437   |

|                                                              |      |           |      |           |        |
|--------------------------------------------------------------|------|-----------|------|-----------|--------|
| No                                                           | Ref  |           | Ref  |           |        |
| Yes                                                          | 1.99 | 1.32–3.01 | 1.27 | 0.69–2.35 |        |
| Listen to the radio                                          |      |           |      |           | 0.349  |
| No                                                           | Ref  |           | Ref  |           |        |
| Yes                                                          | 1.61 | 1.05–2.47 | 1.38 | 0.70–2.72 |        |
| Watch television                                             |      |           |      |           | 0.291  |
| No                                                           | Ref  |           | Ref  |           |        |
| Yes                                                          | 1.34 | 0.86–2.09 | 0.69 | 0.36–1.36 |        |
| Internet access                                              |      |           |      |           | 0.250  |
| No                                                           | Ref  |           | Ref  |           |        |
| Yes                                                          | 2.03 | 1.26–3.25 | 1.41 | 0.79–2.52 |        |
| Own a mobile phone                                           |      |           |      |           | 0.026* |
| No                                                           | Ref  |           | Ref  |           |        |
| Yes                                                          | 2.09 | 1.38–3.19 | 1.43 | 1.00–2.55 |        |
| A healthy person can have HIV                                |      |           |      |           | 0.145  |
| No                                                           | Ref  |           | Ref  |           |        |
| Yes                                                          | 1.56 | 0.75–3.22 | 1.95 | 0.79–4.77 |        |
| A person can get HIV by sharing food with an infected person |      |           |      |           | 0.340  |
| No                                                           | Ref  |           | Ref  |           |        |
| Yes                                                          | 0.76 | 0.42–1.38 | 0.69 | 0.33–1/47 |        |
| Consistent condom use during sex can reduce HIV risk         |      |           |      |           | 0.013* |
| No                                                           | Ref  |           | Ref  |           |        |
| Yes                                                          | 1.86 | 1.04–3.33 | 2.18 | 1.18–4.04 |        |
| Age at first sex                                             |      |           |      |           | 0.509  |
| <15                                                          | Ref  |           | Ref  |           |        |
| >15                                                          | 0.77 | 0.51–1.17 | 0.84 | 0.49–1.43 |        |
| Ever paid for sex                                            |      |           |      |           | 0.036* |

|                                                              |      |           |      |           |        |
|--------------------------------------------------------------|------|-----------|------|-----------|--------|
| No                                                           | Ref  |           | Ref  |           |        |
| Yes                                                          | 3.56 | 1.85–6.84 | 1.75 | 1.01–5.83 |        |
| Number of sexual partners, including spouse (last 12 months) |      |           |      |           | 0.046* |
| 0–1                                                          | Ref  |           | Ref  |           |        |
| 2 or more                                                    | 1.45 | 0.87–2.40 | 1.37 | 1.00–3.14 |        |
| Consistent condom use during sex                             |      |           |      |           | 0.050* |
| No                                                           | Ref  |           | Ref  |           |        |
| Yes                                                          | 0.69 | 0.45–1.05 | 0.59 | 0.34–1.01 |        |
| Had any STIs (last 12 months)                                |      |           |      |           | 0.639  |
| No                                                           | Ref  |           | Ref  |           |        |
| Yes                                                          | 2.63 | 1.36–5.09 | 0.75 | 0.22–2.54 |        |

\* $p \leq 0.05$

COR, crude odds ratio. AOR, adjusted odds ratio. CI, confidence interval. Ref, reference category.

**Note:** Variables such as ever heard of AIDS and STIs had no responses for “ever tested for HIV” and were excluded in the final analysis.

250 Consistent with previous studies [35,36,47,48], this study indicated that demographic factors,  
251 such as age, marital status, and place of residence, were significant predictors of HIV testing uptake.  
252 HIV testing uptake tends to be significantly higher with increasing age, with men aged 20–24 years  
253 being 1.18 times more likely to be tested than adolescent men (aged 15–19 years). A plausible  
254 explanation could be that men aged 15–19 have a lower self-perceived likelihood of HIV compared to  
255 those of increased age, who are more likely to be sexually active and knowledgeable about HIV and its  
256 related risks [36,48,49]. It is also possible that they are more likely to have married and have more  
257 lifetime exposure to HIV testing services, such as during antenatal care [36,50]. Health education and  
258 awareness, including school-based interventions to increase HIV knowledge and risk perceptions, are  
259 feasible options that could promote positive sexual risk behaviors and increase HIV testing uptake  
260 among young men.

261 There was a negative association between HIV testing uptake and marital status. The odds of  
262 HIV testing remained lower among unmarried young men than those who were married. The result  
263 corroborated recent studies in Sub-Saharan Africa [36,51,52]. One possible explanation for this could  
264 be that young men frequently encounter challenges accessing available HIV testing services, are  
265 dissatisfied with the services provided, and have confidentiality issues [35,48]. Another plausible  
266 reason could be that young men have a low-risk perception and are unaware of the physical signs of  
267 HIV and its adverse consequences [53]. Evidence has shown that young men with low-risk perceptions  
268 who do not have access to HIV testing services are less likely to have received an HIV test in their  
269 lifetime [54,55]. Youth-friendly health services can help close the HIV testing gap among young men  
270 by addressing access barriers, providing a more accessible, equitable, and effective social environment,  
271 and linking to HIV treatment and care.

272 The results further revealed that the place of residence was negatively associated with HIV  
273 testing. Young men who were from rural areas were less likely to be tested for HIV, consistent with

274 previous studies elsewhere [52,56]. The possible reason for this could be due to the availability and  
275 accessibility of HIV testing services in urban areas rather than in rural areas, where young men would  
276 have fewer opportunities to be tested for HIV. This disparity may also reflect a lack of HIV services, a  
277 lack of trained HIV-trained health workers, and inequitable outreach programs to reach young men in  
278 rural areas, as previously reported [57,58]. While prioritizing areas that require tailored and youth-  
279 specific interventions to improve HIV testing access and uptake, there is a need to further expand HIV  
280 services to rural areas. Mobile and rural health outreach programs are critical for reaching young men  
281 lacking health care access and increasing HIV testing uptake, and should not be neglected.

282 In agreement with studies in Kenya and Ethiopia [59,60], the current study found that mobile  
283 phone ownership among young men increases the uptake of HIV testing compared to non-mobile  
284 owners. Mobile phone interventions in healthcare (mHealth) have shown success in improving access  
285 to care and treatment, especially in settings where health disparities are more pronounced [61,62].  
286 Evidence is emerging that the use of mobile technologies remains an effective strategy to reach young  
287 people improve access to treatment and retention in care and provide information on HIV services and  
288 prevention interventions, including risk reduction [59,63,64]. Furthermore, mobile phones have been  
289 shown to address barriers of provider prejudice, stigmatization, discrimination, fear of refusal, lack of  
290 privacy, and confidentiality [65,66]. Using mHealth technology provides a potentially promising  
291 implementation strategy for interventions to remedy disparities and barriers to HIV testing and the care  
292 continuum among young men. The study underscores the significance of preliminary, formative  
293 research on population disparities in accessibility, effectiveness, willingness, and use of mobile phones  
294 in HIV prevention programs.

295 In this study, young men who knew that consistent condom use during sex could reduce HIV  
296 risk were 2.18 times more likely to be tested for HIV than their counterparts. The results were similar  
297 to previous studies [67–69], indicating that having a better knowledge of condom efficacy and

298 effectiveness and sexual modes of HIV transmission were associated with condom use. This study also  
299 established that young men who consistently use condoms during sex were less likely to be tested for  
300 HIV. This is consistent with evidence suggesting that increased knowledge of HIV and risk perceptions  
301 were associated with a positive attitude toward condom use [67,68]. It is also possible that discussion  
302 of HIV with a sexual partner, knowing the partner's HIV status, and being in a steady relationship has  
303 been shown to influence the consistent use of condoms [70,71]. Regular health education and  
304 information dissemination on condom self-efficacy and risk reduction are crucial for preventing HIV  
305 infection among this priority group.

306         Regarding sexual risk behaviors, young men who had paid for sex were more likely to be tested  
307 for HIV than their counterparts. These findings are consistent with previous studies elsewhere [72,73],  
308 which suggest that young men who engage in risky sexual behaviors such as sex work and  
309 inconsistently use condoms appropriately perceive their risks of HIV acquisition and transmission and,  
310 as a result, undertake HIV testing. The fact that they engage in such risky behaviors may imply that  
311 their overall risk perception differs from that of those who do not engage in risky behaviors [74].  
312 Strategies for young men who transact sex should not only concentrate on HIV testing and treatment  
313 approaches but also on the social contexts in which they engage in transacting sex. Similarly, having  
314 multiple sexual partners was significantly associated with HIV testing uptake. This finding  
315 corroborates a study in Canada [75] that found an association between HIV testing and having  
316 concurrent and multiple sexual partners among men. Having concurrent and multiple sexual partners  
317 and risky sexual behaviors are predisposed to HIV and other STIs. Evidence shows that young people  
318 who have multiple sex partners and are knowledgeable about HIV and its risks are more likely to  
319 utilize HIV testing services [75,76]. The positive association between having multiple partners and the  
320 uptake of HIV testing implies that there is a need for developing targeted programs for behavior change  
321 and risk reduction for young people in this context.

322 Contrary to other studies [35,36], no association between the uptake of HIV testing and  
323 educational level, employment status, wealth index, mass media exposure, age of sexual debut, or  
324 having an STI was found in this study. However, this study has provided useful findings that have the  
325 potential to inform the strengthening of current HIV prevention programs to target young men in PNG.  
326 Improving HIV testing uptake among young people will play a vital role in reducing the risk of  
327 acquiring HIV among young men, hence optimizing their health and well-being [53]. Targeted and  
328 coordinated programs aimed at increasing HIV testing services among this priority group remain  
329 imperative to achieve the national targets.

### 330 **Study strengths and limitations**

331 The study is based on nationwide population data with a nationally representative sample. Also,  
332 appropriate estimation adjustments, such as weighting, were employed. However, the study has  
333 limitations, and findings should be interpreted cautiously. Given that the data are from a cross-sectional  
334 study, it is impossible to prove the temporal relationship. Since the study's outcome depended on self-  
335 reporting, social desirability bias is highly probable, which might have led to under-reporting by the  
336 participants. In addition, the dataset did not indicate whether young men were in same-sex relationships  
337 (such as men who have sex with men) or not, which could have influenced the uptake of HIV testing.

### 338 **Conclusion**

339 Findings from this study showed that one in six young men had ever tested for HIV in PNG, which is  
340 well below the national HIV/STI targets. Men aged 20–24 years who owned mobile phones, were  
341 aware that consistent condom use reduces HIV risks, had ever paid for sex, and had multiple sexual  
342 partners were significant predictors of HIV testing. To increase HIV testing uptake among young men,  
343 it is crucial to implement targeted and comprehensive youth-friendly HIV/STI education and

344 sensitization programs and enable more accessible and affordable HIV testing services. Moreover,  
345 concerted efforts for outreach and community-based testing programs, especially in rural and  
346 prioritized areas where HIV testing services are inaccessible, are feasible options for young people in  
347 PNG.

348

## 349 **Supporting information**

350 S1 Table. STROBE Checklist.

351 S1 Dataset. HIV testing-young men dataset.

352

## 353 **Acknowledgments**

354 The author would like to thank the DHS program and its partners for the approval to analyze the data.

355 Also, the author is greatly indebted to Dr. Fatch Welcome Kalembo from Curtin University, who  
356 provided constructive feedback and suggestions to strengthen the quality of this manuscript.

357

## 358 **Author contributions**

359 Conceptualization: McKenzie Maviso

360 Data curation: McKenzie Maviso

361 Formal analysis: McKenzie Maviso

362 Methodology: McKenzie Maviso

363 Software: McKenzie Maviso

364 Validation: McKenzie Maviso

365 Writing – original draft: McKenzie Maviso



366 Writing – review & editing: McKenzie Maviso

367

## 368 **References**

- 369 1. Assefa Y, Gilks CF. Ending the epidemic of HIV/AIDS by 2030: Will there be an endgame to  
370 HIV, or an endemic HIV requiring an integrated health systems response in many countries?  
371 *International Journal of Infectious Diseases*. 2020;100: 273–277. doi:10.1016/j.ijid.2020.09.011
- 372 2. UNAIDS. The path that ends AIDS: UNAIDS Global AIDS Update 2023. Geneva, Switzerland;  
373 2023. Available: <https://thepath.unaids.org/>
- 374 3. Frescura L, Godfrey-Faussett P, Feizzadeh A. A, El-Sadr W, Syarif O, Ghys PD, et al. Achieving  
375 the 95 95 95 targets for all: A pathway to ending AIDS. *PLOS ONE*. 2022;17: e0272405.  
376 doi:10.1371/journal.pone.0272405
- 377 4. UNAIDS. Understanding Fast-Track: Accelerating action to end the AIDS Epidemic by 2030.  
378 Geneva, Switzerland; 2015. Available:  
379 [https://www.unaids.org/sites/default/files/media\\_asset/201506\\_JC2743\\_Understanding\\_FastTrack](https://www.unaids.org/sites/default/files/media_asset/201506_JC2743_Understanding_FastTrack_en.pdf)  
380 [\\_en.pdf](https://www.unaids.org/sites/default/files/media_asset/201506_JC2743_Understanding_FastTrack_en.pdf)
- 381 5. Delavande A, Kohler H-P. The Impact of HIV Testing on Subjective Expectations and Risky  
382 Behavior in Malawi. *Demography*. 2012;49: 1011–1036. doi:[https://doi.org/10.1007/s13524-012-](https://doi.org/10.1007/s13524-012-0119-7)  
383 [0119-7](https://doi.org/10.1007/s13524-012-0119-7)
- 384 6. Scott-Sheldon LA, Carey MP, Carey KB, Cain D, Simbayi LC, Mehlomakhulu V, et al. HIV  
385 testing is associated with increased knowledge and reductions in sexual risk behaviours among  
386 men in Cape Town, South Africa. *African Journal of AIDS Research*. 2013;12: 195–201.  
387 doi:<https://doi.org/10.2989/16085906.2013.863219>
- 388 7. Fauk NK, Sukmawati AS, Berek PAL, Ernawati, Kristanti E, Wardoyo SSI, et al. Barriers to HIV  
389 testing among male clients of female sex workers in Indonesia. *International Journal for Equity in*  
390 *Health*. 2018;17: 68. doi:10.1186/s12939-018-0782-4
- 391 8. Hlongwa M, Mashamba-Thompson T, Makhunga S, Hlongwana K. Barriers to HIV testing uptake  
392 among men in sub-Saharan Africa: a scoping review. *African Journal of AIDS Research*. 2020;19:  
393 13–23. doi:10.2989/16085906.2020.1725071
- 394 9. Tetteh JK, Frimpong JB, Budu E, Adu C, Mohammed A, Ahinkorah BO, et al. Comprehensive  
395 HIV/AIDS knowledge and HIV testing among men in sub-Saharan Africa: a multilevel  
396 modelling. *Journal of Biosocial Science*. 2021/11/05 ed. 2022;54: 975–990.  
397 doi:10.1017/S0021932021000560
- 398 10. Caltabiano M, Castiglioni M, De-Rose A. Changes in the sexual behaviour of young people:  
399 introduction. *Genus*. 2020;76: 38. doi:10.1186/s41118-020-00107-1

- 400 11. Hittner JB, Owens EC, Swickert RJ. Influence of Social Settings on Risky Sexual Behavior.  
401 SAGE Open. 2016;6: 2158244016629187. doi:10.1177/2158244016629187
- 402 12. Cho H-S, Yang Y. Relationship Between Alcohol Consumption and Risky Sexual Behaviors  
403 Among Adolescents and Young Adults: A Meta-Analysis. International Journal of Public Health.  
404 2023;68. doi:<https://doi.org/10.3389/ijph.2023.1605669>
- 405 13. Harris B, McCredie MN, Truong T, Regan T, Thompson CG, Leach W, et al. Relations Between  
406 Adolescent Sensation Seeking and Risky Sexual Behaviors Across Sex, Race, and Age: A Meta-  
407 Analysis. Archives of Sexual Behavior. 2023;52: 191–204. doi:<https://doi.org/10.1007/s10508-022-02384-7>
- 409 14. Manu A, Ogum-Alangea D, Azilaku JC, Anaba EA, Torpey K. Risky sexual behaviours and HIV  
410 testing among young people in Ghana: evidence from the 2017/2018 Multiple Indicator Cluster  
411 Survey. Reproductive Health. 2022;19: 125. doi:<https://doi.org/10.1186/s12978-022-01439-1>
- 412 15. Bolarinwa OA, Ajayi KV, Sah RK. Association between knowledge of Human Immunodeficiency  
413 Virus transmission and consistent condom use among sexually active men in Nigeria: An analysis  
414 of 2018 Nigeria Demographic Health Survey. Jilo GK, editor. PLOS Glob Public Health. 2022;2:  
415 e0000223. doi:<https://dx.plos.org/10.1371/journal.pgph.0000223>
- 416 16. Wilcken A, Miiro-Nakayima F, Hizaamu RN, Keil T, Balaba-Byansi D. Male circumcision for  
417 HIV prevention - a cross-sectional study on awareness among young people and adults in rural  
418 Uganda. BMC Public Health. 2010;10: 209. doi:10.1186/1471-2458-10-209
- 419 17. Benders A, Nakamura K, Seino K, Al-Sobaihi S. Factors Associated with Low Uptake of Medical  
420 Male Circumcision Among Adolescent Boys in Tanzania: A Multinomial Logistic Regression  
421 Modeling. HIV/AIDS - Research and Palliative Care. 2022;14: 565–575.  
422 doi:10.2147/HIV.S387380
- 423 18. Folayan MO, Sam-Agudu NA, Harrison A. Exploring the why: risk factors for HIV and barriers  
424 to sexual and reproductive health service access among adolescents in Nigeria. BMC Health  
425 Services Research. 2022;22: 1198. doi:10.1186/s12913-022-08551-9
- 426 19. Alexis Sentís, Mario Martin-Sanchez, Maider Arando, Martí Vall, María Jesus Barbera, Inma  
427 Ocaña, et al. Sexually transmitted infections in young people and factors associated with HIV  
428 coinfection: an observational study in a large city. BMJ Open. 2019;9: e027245.  
429 doi:10.1136/bmjopen-2018-027245
- 430 20. Pettifor A, Bekker L-G, Hosek S, DiClemente R, Rosenberg M, Bull SS, et al. Preventing HIV  
431 among young people: research priorities for the future. J Acquir Immune Defic Syndr. 2013;63  
432 Suppl 2: S155–S160. doi:10.1097/QAI.0b013e31829871fb
- 433 21. Pettifor A, Stoner M, Pike C, Bekker L-G. Adolescent lives matter: preventing HIV in  
434 adolescents. Curr Opin HIV AIDS. 2018;13: 265–273. doi:10.1097/COH.0000000000000453
- 435 22. Hakim AJ, Coy K, Badman SG, Willie B, Narokobi R, Gabuzzi J, et al. One size does not fit all:  
436 HIV prevalence and correlates of risk for men who have sex with men, transgender women in

- 437 multiple cities in Papua New Guinea. *BMC Public Health*. 2019;19: 623.  
438 doi:<https://doi.org/10.1186/s12889-019-6942-7>
- 439 23. Kelly-Hanku A, Willie B, Weikum D, Boli Neo R, Kupul M, Coy K. Kauntim mi tu: Multi-site  
440 summary report from the key population integrated bio-behavioural survey, Papua New Guinea.  
441 Goroka: Papua New Guinea Institute of Medical Research and Kirby Institute, UNSW Sydney.  
442 2018. Available: [https://www.kirby.unsw.edu.au/research/reports/kauntim-mi-tu-port-moresby-](https://www.kirby.unsw.edu.au/research/reports/kauntim-mi-tu-port-moresby-2017)  
443 2017
- 444 24. UNAIDS. Country facts - Papua New Guinea 2022. UNAIDS; 2022. Available:  
445 <https://www.unaids.org/en/regionscountries/countries/papuanewguinea>
- 446 25. Grundy J, Dakulala P, Wai K, Maalsen A, Whittaker M. Independent State of Papua New Guinea  
447 Health System Review. World Health Organization. Regional Office for South-East Asia; 2019.  
448 Available: <https://iris.who.int/handle/10665/280088>
- 449 26. Maviso M, Kalembo FW. Prevalence and determinants of not testing for HIV among young adult  
450 women in Papua New Guinea: findings from the Demographic and Health Survey, 2016–2018.  
451 *BMJ Open*. 2024;14: e075424. doi:10.1136/bmjopen-2023-075424
- 452 27. Worth H. HIV Prevention in Papua New Guinea: Is It Working or Not? *World Journal of AIDS*.  
453 2012;2: 117.
- 454 28. Baigry MI, Ray R, Lindsay D, Kelly-Hanku A, Redman-MacLaren M. Barriers and enablers to  
455 young people accessing sexual and reproductive health services in Pacific Island Countries and  
456 Territories: A scoping review. *PLOS ONE*. 2023;18: e0280667.  
457 doi:<https://doi.org/10.1371/journal.pone.0280667>
- 458 29. Gray N, Azzopardi P, Kennedy E, Willersdorf E, Creati M. Improving Adolescent Reproductive  
459 Health in Asia and the Pacific: Do We Have the Data? A Review of DHS and MICS Surveys in  
460 Nine Countries. *Asia Pac J Public Health*. 2013;25: 134–144. doi:10.1177/1010539511417423
- 461 30. Kelly A, Worth H, Akuani F, Kepa B, Kupul M, Walizopa L, et al. Gendered talk about sex,  
462 sexual relationships and HIV among young people in Papua New Guinea. *Culture, Health &*  
463 *Sexuality*. 2010;12: 221–232. doi:<https://doi.org/10.1080/13691050903181107>
- 464 31. Kuzma J, Himata R. A pilot study of the knowledge, behaviour and attitudes connected with  
465 HIV/AIDS among youth in PNG. *Contemporary PNG Studies*. 2005;3: 1–12.
- 466 32. Yakam LT. Factors associated with alcohol consumption among students in Divine Word  
467 University, Madang Province, Papua New Guinea. *Contemporary PNG Studies*. 2021;34: 17–27.
- 468 33. National Statistical Office (NSO). National Population and Housing Census 2011. Port Moresby,  
469 Papua New Guinea: National Statistical Office; 2015. Available: [https://png-](https://png-data.sprep.org/resource/papua-new-guinea-2011-national-report)  
470 [data.sprep.org/resource/papua-new-guinea-2011-national-report](https://png-data.sprep.org/resource/papua-new-guinea-2011-national-report)
- 471 34. National Statistical Office (NSO) [Papua New Guinea], ICF. Papua New Guinea Demographic  
472 and Health Survey 2016-18. Port Moresby, Papua New Guinea, and Rockville, Maryland, USA:  
473 NSO and ICF; 2019. Available: <https://www.dhsprogram.com/pubs/pdf/FR364/FR364.pdf>

- 474 35. Ajayi AI, Awopegba OE, Adeagbo OA, Ushie BA. Low coverage of HIV testing among  
475 adolescents and young adults in Nigeria: Implication for achieving the UNAIDS first 95. PLOS  
476 ONE. 2020;15: e0233368. doi:<https://doi.org/10.1371/journal.pone.0233368>
- 477 36. Sonko I, Chung M-H, Hou W-H, Chen W-T, Chang P-C. Predictors of HIV testing among youth  
478 aged 15–24 years in The Gambia. PLOS ONE. 2022;17: e0263720.  
479 doi:<https://doi.org/10.1371/journal.pone.0263720>
- 480 37. Asaolu IO, Gunn JK, Center KE, Koss MP, Iwelunmor JI, Ehiri JE. Predictors of HIV Testing  
481 among Youth in Sub-Saharan Africa: A Cross-Sectional Study. PLOS ONE. 2016;11: e0164052.  
482 doi:<https://doi.org/10.1371/journal.pone.0164052>
- 483 38. Zhang Z. Model building strategy for logistic regression: purposeful selection. *Annals of*  
484 *Translational Medicine*; Vol 4, No 6 (March 25, 2016): *Annals of Translational Medicine*  
485 (Toward Precision Medicine in Neurological Diseases). 2016 [cited 31 Dec 2015].  
486 doi:<http://dx.doi.org/10.21037/atm.2016.02.15>
- 487 39. Ijaiya MA, Anibi A, Abubakar MM, Obanubi C, Anjorin S, Uthman OA. A multilevel analysis of  
488 the determinants of HIV testing among men in Sub-Saharan Africa: Evidence from Demographic  
489 and Health Surveys across 10 African countries. PLOS Global Public Health. 2024;4: e0003159.  
490 doi:[10.1371/journal.pgph.0003159](https://doi.org/10.1371/journal.pgph.0003159)
- 491 40. Olakunde BO, Adeyinka DA, Olawepo JO, Pharr JR. HIV testing among men in Nigeria: a  
492 comparative analysis between young people and adults. *AIDS Care*. 2020;32: 155–162.  
493 doi:[10.1080/09540121.2019.1622642](https://doi.org/10.1080/09540121.2019.1622642)
- 494 41. Aluzimbi G, Lubwama G, Muyonga M, Hladik W. HIV Testing and Risk Perceptions: A  
495 Qualitative Analysis of Secondary School Students in Kampala, Uganda. *J Public Health Afr*.  
496 2017;8: 577. doi:[10.4081/jphia.2017.577](https://doi.org/10.4081/jphia.2017.577)
- 497 42. Carmone A, Bomai K, Bongsi W, Frank TD, Dalepa H, Loifa B, et al. Partner testing, linkage to  
498 care, and HIV-free survival in a program to prevent parent-to-child transmission of HIV in the  
499 Highlands of Papua New Guinea. *Global Health Action*. 2014;7: 24995.  
500 doi:<https://doi.org/10.3402/gha.v7.24995>
- 501 43. Badman SG, Valley LM, Toliman P, Kariwiga G, Lote B, Pomat W, et al. A novel point-of-care  
502 testing strategy for sexually transmitted infections among pregnant women in high-burden  
503 settings: results of a feasibility study in Papua New Guinea. *BMC Infectious Diseases*. 2016;16:  
504 250. doi:<https://doi.org/10.1186/s12879-016-1573-4>
- 505 44. Saweri OP, Batura N, Pulford J, Khan MM, Hou X, Pomat WS, et al. Investigating health service  
506 availability and readiness for antenatal testing and treatment for HIV and syphilis in Papua New  
507 Guinea. *BMC Pregnancy and Childbirth*. 2022;22: 780. doi:<https://doi.org/10.1186/s12884-022-05097-w>
- 509 45. Hakim AJ, Badman SG, Weikum D, Amos A, Willie B, Narokobi R, et al. Considerable distance  
510 to reach 90-90-90 targets among female sex workers, men who have sex with men and  
511 transgender women in Port Moresby, Papua New Guinea: findings from a cross-sectional

- 512 respondent-driven sampling survey. *Sex Transm Infect.* 2020;96: 143.  
513 doi:<http://dx.doi.org/10.1136/sextrans-2019-053961>
- 514 46. Mitchell E, Hakim A, Nosi S, Kupul M, Boli-Neo R, Aeno H, et al. A socio-ecological analysis of  
515 factors influencing HIV treatment initiation and adherence among key populations in Papua New  
516 Guinea. *BMC Public Health.* 2021;21: 2003. doi:<https://doi.org/10.1186/s12889-021-12077-w>
- 517 47. Ajiboye AS, Eshetu F, Lulseged S, Getaneh Y, Tademe N, Kifle T, et al. Predictors of HIV testing  
518 among youth 15–24 years in urban Ethiopia, 2017–2018 Ethiopia population-based HIV impact  
519 assessment. *PLOS ONE.* 2023;18: e0265710. doi:10.1371/journal.pone.0265710
- 520 48. Alem AZ, Liyew AM, Guadie HA. Spatial pattern and associated factors of HIV testing and  
521 counselling among youths (15–24 years) in Ethiopia. *BMC Public Health.* 2021;21: 644.  
522 doi:10.1186/s12889-021-10677-0
- 523 49. Wang Y, Kinsler JJ, Kiwuwa-Muyingo S. Factors associated with HIV testing among youth in  
524 Tanzania based on the 2016–2017 Tanzania HIV Impact Survey (THIS). *PLOS Global Public  
525 Health.* 2022;2: e0000536. doi:10.1371/journal.pgph.0000536
- 526 50. Kalibbala D, Mpungu SK, Ssuna B, Muzeyi W, Mberesero H, Semitala FC, et al. Determinants of  
527 testing for HIV among young people in Uganda. A nested, explanatory-sequential study. *PLOS  
528 Global Public Health.* 2022;2: e0000870. doi:10.1371/journal.pgph.0000870
- 529 51. Nshimirimana C, Vuylsteke B, Smekens T, Benova L. HIV testing uptake and determinants  
530 among adolescents and young people in Burundi: a cross-sectional analysis of the Demographic  
531 and Health Survey 2016–2017. *BMJ Open.* 2022;12: e064052.  
532 doi:<http://dx.doi.org/10.1136/bmjopen-2022-064052>
- 533 52. Adugna DG, Worku MG. HIV testing and associated factors among men (15–64 years) in  
534 Eastern Africa: a multilevel analysis using the recent demographic and health survey. *BMC Public  
535 Health.* 2022;22: 2170. doi:10.1186/s12889-022-14588-6
- 536 53. Musonda E, Phiri M, Shasha L, Bwalya C, Musemangezhi S, Ishimwe SMC, et al. Prevalence of  
537 HIV testing uptake among the never-married young men (15–24) in sub-Saharan Africa: An  
538 analysis of demographic and health survey data (2015–2020). *PLOS ONE.* 2023;18: e0292182.  
539 doi:10.1371/journal.pone.0292182
- 540 54. Jung MS, Dlamini NS, Cui X, Cha K. Prevalence of HIV testing and associated factors among  
541 young adolescents in Eswatini: a secondary data analysis. *BMC Pediatrics.* 2022;22: 659.  
542 doi:<https://doi.org/10.1186/s12887-022-03698-0>
- 543 55. Muravha T, Hoffmann CJ, Botha C, Maruma W, Charalambous S, Chetty-Makkan CM. Exploring  
544 perceptions of low risk behaviour and drivers to test for HIV among South African youth. *PLOS  
545 ONE.* 2021;16: e0245542. doi:10.1371/journal.pone.0245542
- 546 56. Mabaso M, Maseko G, Sewpaul R, Naidoo I, Jooste S, Takatshana S, et al. Trends and correlates  
547 of HIV prevalence among adolescents in South Africa: evidence from the 2008, 2012 and 2017  
548 South African National HIV Prevalence, Incidence and Behaviour surveys. *AIDS Research and  
549 Therapy.* 2021;18: 97. doi:<https://doi.org/10.1186/s12981-021-00422-3>

- 550 57. Sanga ES, Mukumbang FC, Mushi AK, Lerebo W, Zarowsky C. Understanding factors  
551 influencing linkage to HIV care in a rural setting, Mbeya, Tanzania: qualitative findings of a  
552 mixed methods study. *BMC Public Health*. 2019;19: 383. doi:10.1186/s12889-019-6691-7
- 553 58. Pellowski JA. Barriers to care for rural people living with HIV: a review of domestic research and  
554 health care models. *J Assoc Nurses AIDS Care*. 2013;24: 422–437.  
555 doi:<https://doi.org/10.1016/j.jana.2012.08.007>
- 556 59. Jennings Mayo-Wilson L, Kang B-A, Mathai M, Mak'anyengo MO, Ssewamala FM. Mobile  
557 phone access, willingness, and usage for HIV-related services among young adults living in  
558 informal urban settlements in Kenya: A cross-sectional analysis. *International Journal of Medical  
559 Informatics*. 2022;161: 104728. doi:<https://doi.org/10.1016/j.ijmedinf.2022.104728>
- 560 60. Nigatu M, Kabeta T, Taye A, Belina M. HIV voluntary counseling and testing uptake and  
561 associated factors among Ethiopian youths: evidence from the 2016 EDHS using multilevel  
562 modeling. *BMC Infectious Diseases*. 2021;21: 334. doi:10.1186/s12879-021-06021-x
- 563 61. Hall CS, Fottrell E, Wilkinson S, Byass P. Assessing the impact of mHealth interventions in low-  
564 and middle-income countries – what has been shown to work? *Global Health Action*. 2014;7:  
565 25606. doi:10.3402/gha.v7.25606
- 566 62. Nwaozuru U, Obiezu-Umeh C, Shato T, Uzoaru F, Mason S, Carter V, et al. Mobile health  
567 interventions for HIV/STI prevention among youth in low- and middle-income countries  
568 (LMICs): a systematic review of studies reporting implementation outcomes. *Implement Sci  
569 Commun*. 2021;2: 126–126. doi:10.1186/s43058-021-00230-w
- 570 63. Garg PR, Uppal L, Mehra S, Mehra D. Mobile Health App for Self-Learning on HIV Prevention  
571 Knowledge and Services Among a Young Indonesian Key Population: Cohort Study. *JMIR  
572 Mhealth Uhealth*. 2020;8: e17646–e17646. doi:<https://doi.org/10.2196/17646>
- 573 64. Ippoliti NB, L'Engle K. Meet us on the phone: mobile phone programs for adolescent sexual and  
574 reproductive health in low-to-middle income countries. *Reproductive Health*. 2017;14: 11.  
575 doi:10.1186/s12978-016-0276-z
- 576 65. Mulawa MI, Rosengren AL, Amico KR, Hightow-Weidman LB, Muessig KE. mHealth to reduce  
577 HIV-related stigma among youth in the United States: a scoping review. *Mhealth*. 2021;7: 35.  
578 doi:<http://dx.doi.org/10.21037/mhealth-20-68>
- 579 66. Feroz AS, Ali NA, Khoja A, Asad A, Saleem S. Using mobile phones to improve young people  
580 sexual and reproductive health in low and middle-income countries: a systematic review to  
581 identify barriers, facilitators, and range of mHealth solutions. *Reprod Health*. 2021;18: 9–9.  
582 doi:10.1186/s12978-020-01059-7
- 583 67. Hosseini Hooshyar S, Karamouzian M, Mirzazadeh A, Haghdoost AA, Sharifi H, Shokoohi M.  
584 Condom Use and its Associated Factors Among Iranian Youth: Results From a Population-Based  
585 Study. *Int J Health Policy Manag*. 2018;7: 1007–1014. doi:10.15171/ijhpm.2018.65

- 586 68. Yosef T, Nigussie T. Behavioral Profiles and Attitude toward Condom Use among College  
587 Students in Southwest Ethiopia. *BioMed Research International*. 2020;2020: 1–6.  
588 doi:10.1155/2020/9582139
- 589 69. Masoda M, Govender I. Knowledge and attitudes about and practices of condom use for reducing  
590 HIV infection among Goma University students in the Democratic Republic of Congo. *Southern*  
591 *African Journal of Epidemiology and Infection*. 2013;28: 61–68.  
592 doi:10.1080/10158782.2013.11441521
- 593 70. Ajayi AI, Ismail KO, Akpan W. Factors associated with consistent condom use: a cross-sectional  
594 survey of two Nigerian universities. *BMC Public Health*. 2019;19: 1207.  
595 doi:<https://doi.org/10.1186/s12889-019-7543-1>
- 596 71. Ajayi OA, Ogunsola OO, Akinro Y, Adamu-Oyegun S, Wudiri K, Ojo TO, et al. Consistent  
597 condom use and associated factors among HIV positive women of reproductive age on anti-  
598 retroviral treatment in Ogun State, Nigeria. *Pan Afr Med J*. 2022;43: 101.  
599 doi:10.11604/pamj.2022.43.101.32806
- 600 72. Hodgins C, Stannah J, Kuchukhidze S, Zembe L, Eaton JW, Boily M-C, et al. Population sizes,  
601 HIV prevalence, and HIV prevention among men who paid for sex in sub-Saharan Africa (2000–  
602 2020): A meta-analysis of 87 population-based surveys. *PLOS Medicine*. 2022;19: e1003861.  
603 doi:10.1371/journal.pmed.1003861
- 604 73. Gebresilassie F, Ayele B, Hadgu T, Gebretnsae H, Negash D, Demoz Ghebremdhin K, et al.  
605 Predictors of Condom Use Among Youth of the Rural Tigray, Northern Ethiopia: Community-  
606 Based Cross-Sectional Study. *HIV/AIDS - Research and Palliative Care*. 2023;15: 377–385.  
607 doi:<https://doi.org/10.2147/HIV.S412337>
- 608 74. Dizechi S, Brody C, Tuot S, Chhea C, Saphonn V, Yung K, et al. Youth paying for sex: what are  
609 the associated factors? Findings from a cross-sectional study in Cambodia. *BMC Public Health*.  
610 2018;18: 113. doi:<https://doi.org/10.1186/s12889-017-4999-8>
- 611 75. Luginaah NA, Konkor I, Lawson ES, Mkandawire P, Husbands W, Omorodion F, et al.  
612 Concurrent sexual partnerships and HIV testing among heterosexual Black men in Ontario,  
613 Canada: findings from the weSpeak study. *Ethn Health*. 2022;27: 1825–1840.  
614 doi:10.1080/13557858.2021.1976395
- 615 76. Wilson Chialepeh N, Sathiyasusuman A. Associated Risk Factors of STIs and Multiple Sexual  
616 Relationships among Youths in Malawi. *PLOS ONE*. 2015;10: e0134286.  
617 doi:10.1371/journal.pone.0134286

618  
619

## Ever tested for HIV among young men in PNG

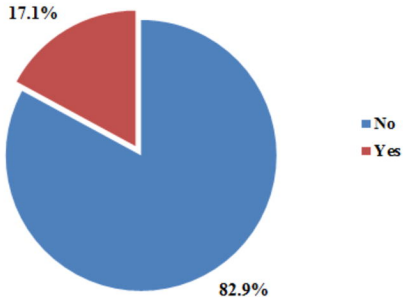

Source: https://medrxiv.org/content/10.1101/2023.03.17.23287339v4.full.pdf
